# Supplementary material
Source: PubMed Central journal article supplement (PMC3287365)
Supplement: NIHMS334688-supplement-1.pdf [file NIHMS334688-supplement-1.pdf]

Supplement S1. Multinomial Logit Regression Results on the Likelihood that  
Driving Time to the Nearest TC Increases By Less Than 30 Minutes 2001-2007

| Reference group: no increase in driving time                          | % experience <30min increase | Relative Risk Ratio | CI          |
|-----------------------------------------------------------------------|------------------------------|---------------------|-------------|
| <b>Baseline vulnerable population characteristics by ZIP code</b>     |                              |                     |             |
| <i>Share of population below Federal poverty line</i>                 |                              |                     |             |
| low share (reference group)                                           | 16%                          | 1.00                |             |
| medium share                                                          | 16%                          | 0.83**              | [0.72,0.95] |
| high share                                                            | 15%                          | 0.74**              | [0.61,0.89] |
| <i>Share of unemployed population</i>                                 |                              |                     |             |
| low share (reference group)                                           | 16%                          | 1.00                |             |
| medium share                                                          | 18%                          | 1.00                | [0.88,1.14] |
| high share                                                            | 15%                          | 0.82*               | [0.69,0.97] |
| <i>Share of African-American population</i>                           |                              |                     |             |
| low share (reference group)                                           | 15%                          | 1.00                |             |
| medium share (middle 1/3)                                             | 17%                          | 1.33**              | [1.17,1.52] |
| high share (upper 1/3)                                                | 18%                          | 1.53**              | [1.33,1.76] |
| <i>Share of Hispanic population</i>                                   |                              |                     |             |
| low share (reference group)                                           | 16%                          | 1.00                |             |
| medium share                                                          | 17%                          | 1.18*               | [1.02,1.37] |
| high share                                                            | 15%                          | 1.35**              | [1.08,1.70] |
| <i>Share of other non-White population</i>                            |                              |                     |             |
| low share (reference group)                                           | 17%                          | 1.00                |             |
| medium share                                                          | 16%                          | 0.70**              | [0.60,0.82] |
| high share                                                            | 13%                          | 0.67**              | [0.53,0.85] |
| <i>Share of uninsured population<sup>a</sup></i>                      |                              |                     |             |
| low share (reference group)                                           | 17%                          | 1.00                |             |
| medium share                                                          | 17%                          | 1.23**              | [1.08,1.40] |
| high share                                                            | 14%                          | 1.28**              | [1.08,1.50] |
| <i>Share of elderly population</i>                                    |                              |                     |             |
| low share (reference group)                                           | 17%                          | 1.00                |             |
| medium share                                                          | 16%                          | 0.82**              | [0.72,0.93] |
| high share                                                            | 15%                          | 0.90                | [0.79,1.03] |
| <i>Share of foreign-born population</i>                               |                              |                     |             |
| low share (reference group)                                           | 16%                          | 1.00                |             |
| medium share                                                          | 16%                          | 1.10                | [0.96,1.26] |
| high share                                                            | 15%                          | 0.85+               | [0.70,1.03] |
| Urban communities (reference group)                                   | 19%                          | 1.00                |             |
| Rural communities                                                     | 13%                          | 0.85*               | [0.74,0.98] |
| log(zip-code level population)                                        |                              | 1.04                | [0.98,1.11] |
| <b>Baseline hospital market characteristics within 15-mile radius</b> |                              |                     |             |
| presence of at least 1 trauma center                                  |                              | 1.00                | [0.89,1.13] |
| presence of for-profit hospitals                                      |                              | 1.00                | [0.89,1.13] |
| presence of government hospitals                                      |                              | 0.94                | [0.84,1.06] |
| presence of teaching hospitals                                        |                              | 1.22**              | [1.07,1.38] |
| Number of observations in the analysis                                |                              |                     | 31475       |

statistical significance: + 0.10 \* 0.05 \*\* 0.01

a. ZIP codes that belong to the same county share the same percent of uninsured.
